# Supplementary material for: Anisotropic Polymer Adsorption on Molybdenite Basal and Edge Surfaces and Interaction Mechanism With Air Bubbles
Source: PubMed Central journal article supplement (PMC6124653; doi:10.3389/fchem.2018.00361), 2018-08-20
Supplement: Image_1.pdf [file Image_1.pdf]

*Supporting Information*

**Anisotropic Polymer Adsorption on Molybdenite Basal and Edge  
Surfaces and Interaction Mechanism with Air Bubbles**

*Lei Xie<sup>1</sup>, Jingyi Wang<sup>1</sup>, Jun Huang<sup>1</sup>, Xin Cui<sup>1</sup>, Xiaogang Wang<sup>2</sup>, Qingxia Liu<sup>1</sup>, Hao Zhang<sup>1</sup>,  
Qi Liu<sup>1</sup>, and Hongbo Zeng<sup>1,\*</sup>*

<sup>1</sup>*Department of Chemical and Materials Engineering, University of Alberta, Edmonton, Alberta,  
T6G 1H9, Canada*

<sup>2</sup>*College of Material Science & Engineering, Heavy Machinery Engineering Research Center of  
Education Ministry, Taiyuan University of Science and Technology, Taiyuan 030024, China*

*\*Email: [hongbo.zeng@ualberta.ca](mailto:hongbo.zeng@ualberta.ca), Phone: +1-780-492-1044, Fax: +1-780-492-2881*

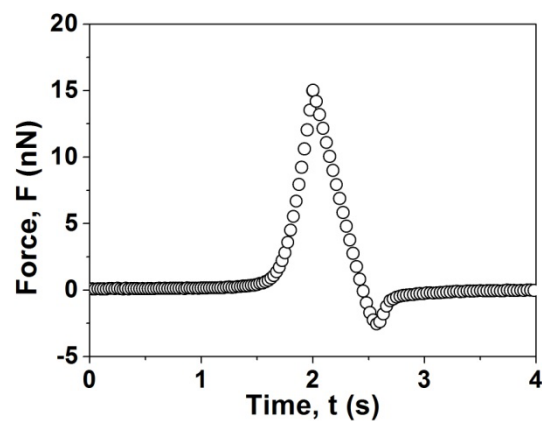

**Figure S1.** Interaction forces between an air bubble ( $R = 74 \mu\text{m}$ ) and a treated  $\text{MoS}_2$  basal plane conditioned in 100 ppm CMC solution in 500 mM NaCl at  $v = 1 \mu\text{m/s}$ .
